# Supplementary material for: MRP5 and MRP9 Play a Concerted Role in Male Reproduction and Mitochondrial Function
Source: bioRxiv or medRxiv preprint supplement (doi:10.1101/2021.06.19.449033), 2021-06-20
Supplement: Supplementary file [file media-1.pdf]

1 **Supplementary Information for**

2 MRP5 and MRP9 Play a Concerted Role in Male Reproduction and Mitochondrial  
3 Function

4  
5  
6 Ian Chambers, Praveen Kumar, Jens Lichtenberg, Pengcheng Wang, Jianshi Yu, John Phillips,  
7 Maureen A. Kane, David Bodine, Iqbal Hamza

8  
9  
10 **Corresponding Author:** Iqbal Hamza

11 **Email:** [hamza@umd.edu](mailto:hamza@umd.edu)

12  
13  
14 **This PDF file includes:**

15  
16       Figures S1 to S8  
17       Tables S1 to S4  
18       Legend for Movie S1

19  
20 **Other supplementary materials for this manuscript include the following:**

21  
22       Movie S1  
23

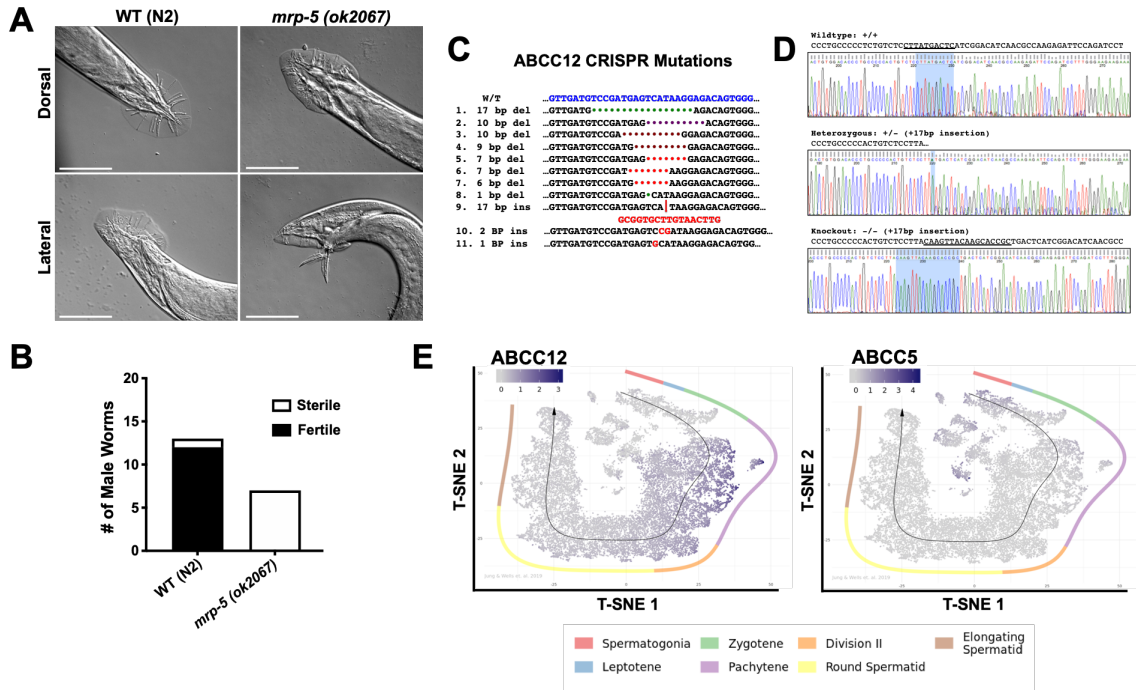

24  
25

26 **Fig. S1. The generation of MRP9 knockout mice, a MRP5 paralog absent in worms**  
 27 **{A}** MRP-5 null worms (right) display reproduction related defects in the male tail with a reduced  
 28 number of rays (top) and potentially defective spicule retraction after mating attempts (bottom)  
 29 compared to WT (left). Scale bar equals 50  $\mu$ m. **{B}** 7 Males of each indicated strain were picked  
 30 onto a plate with one sperm exhausted WT hermaphrodite per replicate; wildtype n = 13 (12 / 1)  
 31 *mrp5* n = 7 (0 / 7). Presence of progeny was used as a measure of male mating success due to  
 32 the fact that hermaphrodites were sperm exhausted. **{C}** DNA sequence of *Abcc12* target site  
 33 and the sequences of the CRISPR induced mutations generated in the founder animal lines. **{D}**  
 34 Sequencing chromatograms of RT-PCR from testes of *Abcc12* WT, HET and KO mice confirming  
 35 mutation. **{E}** Single cell RNAseq testes atlas output of *Abcc12* (left) and *Abcc5* (right) gene  
 36 expression profiles along the temporospatial axis of spermatid maturation taken from Jung et al  
 37 2019 dataset.  
 38

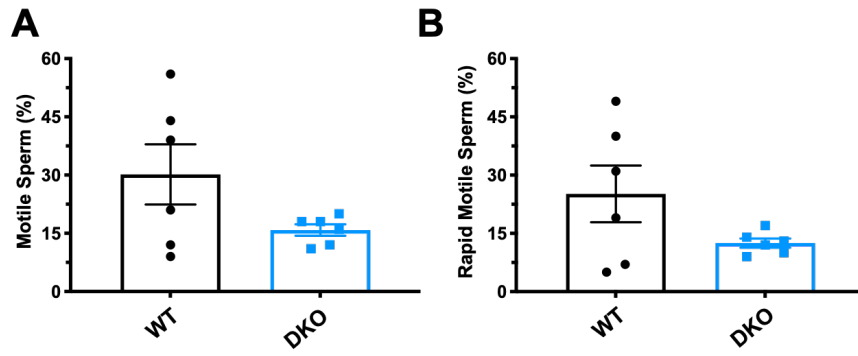

39  
40

41 **Fig. S2. DKO sperm show trends in reduced motility**

42 **{A}** Percentage of “progressive motile” capacitated WT and DKO sperm assessed by IVOS  
 43 computer assisted sperm analyzer system. **{B}** Percentage of “rapid motile” capacitated sperm  
 44 assessed by IVOS computer assisted sperm analyzer system.  
 45

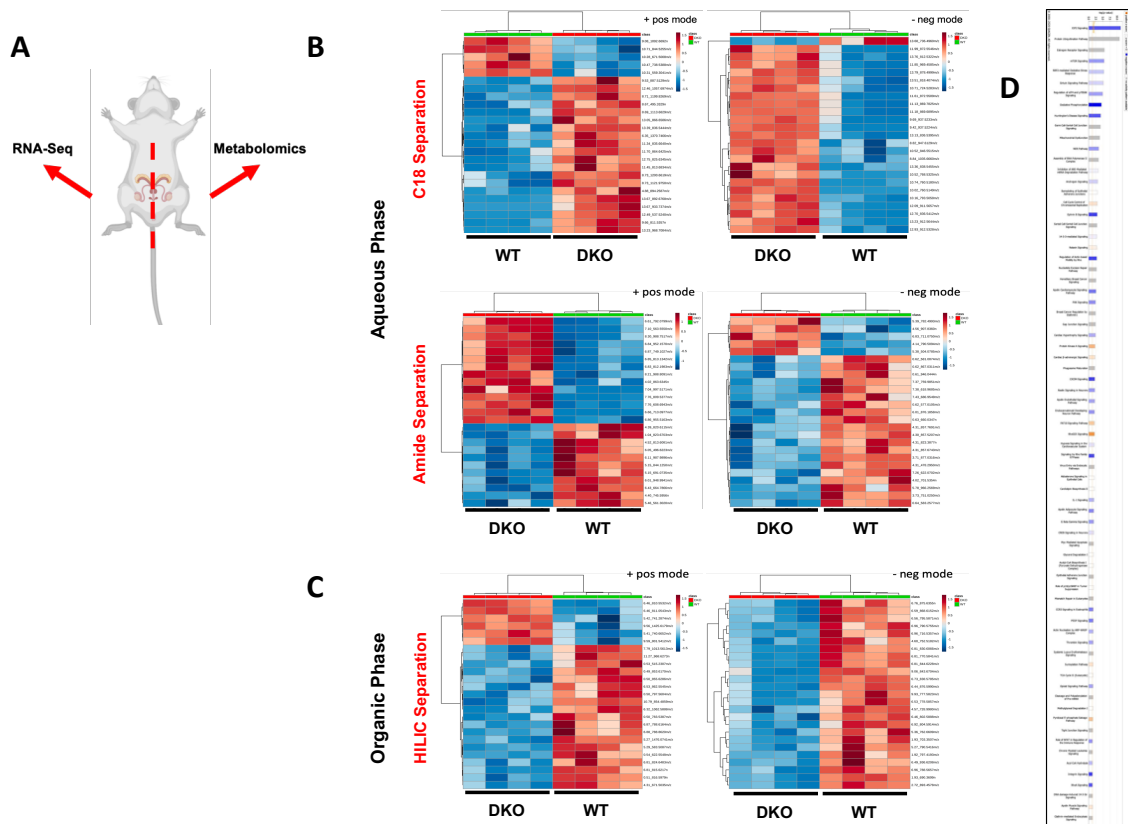

46  
47

48 **Fig. S3. Metabolomics and RNAseq from the same animal highlight pervasive**  
49 **perturbations in the testes of DKO mice**

50 **{A}** Schematic of paired testes from same mice for both metabolomics and RNAseq analysis.  
51 **{B}** Variable Importance in Projection (VIP) heatmaps of differential metabolites from aqueous  
52 phase extractions separated on C18 (top) or amide (bottom) columns. Samples analyzed via  
53 mass spectrometry in positive ion (left) or negative ion (right) mode from testes in WT and DKO  
54 mice. **{C}** Variable Importance in Projection (VIP) Heatmaps of differential metabolites from  
55 organic phase extractions separated on a HILIC column. Samples analyzed via mass  
56 spectrometry in positive ion (left) or negative ion (right) mode from testes in WT and DKO mice.  
57 **{D}** All significantly altered GO pathways by Qiagen IPA analysis of testes RNAseq differentially  
58 expressed genes.  
59

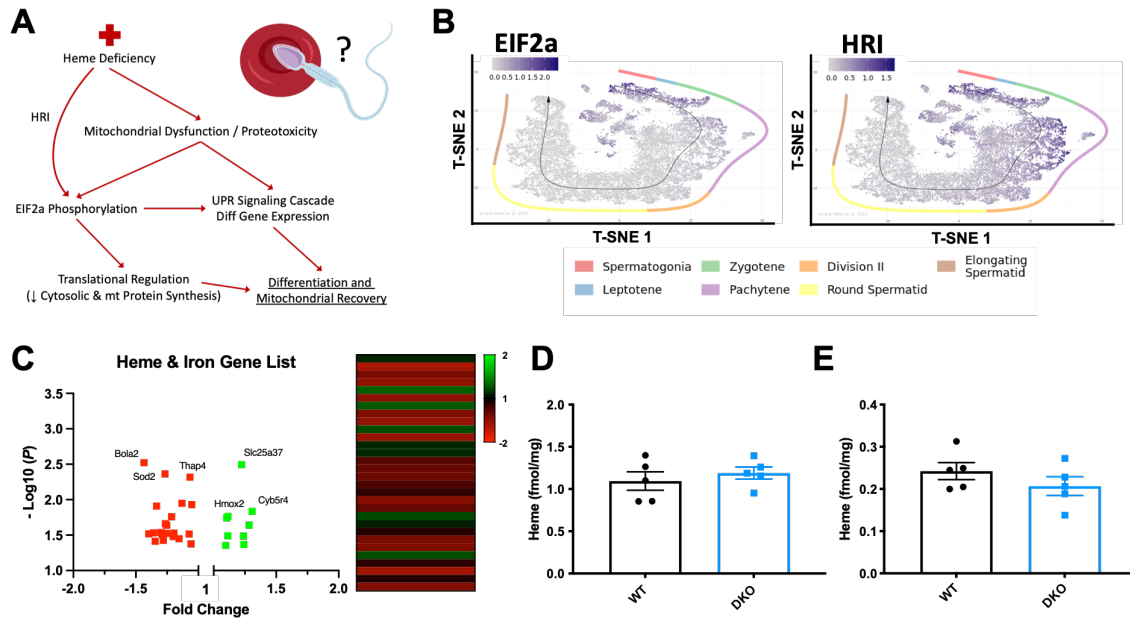

60  
61

62 **Fig. S4. Probing heme / iron homeostasis as a culprit for EIF2 signaling in the testes**  
 63 **{A}** Schematic of canonical heme dependent EIF2a regulation of mitochondrial homeostasis and  
 64 differentiation in the erythron lineage, which has not yet been examined in spermatozoa  
 65 differentiation / proliferation. **{B}** Gene expression profiles for *Eif2a* (left) and *Eif2ak1* (right) along  
 66 the temporospatial axis of spermatid maturation from single cell RNAseq of the testes taken from  
 67 Jung et al 2019 [153]. **{C}** Output of pathway pipeline analysis investigating all “heme”, “heme  
 68 binding” and “iron homeostasis” GO pathway gene lists. Gene lists were curated for integration  
 69 with RNA expression data. Real expression was validated by thresholding a minimum 10  
 70 transcripts per million and statistically significant genes ( $P < 0.05$ ) fold change were output in  
 71 volcano plot and heatmap with 30 total genes identified, sorted by ascending  $P$  value. **{D}** Heme  
 72 content of whole testis from DKO and WT mice by oxalic acid quantification,  $n=5$  animals per  
 73 genotype. **{E}** Heme content of seminal vesicles from DKO and WT mice by oxalic acid  
 74 quantification,  $n=5$  animals per genotype.  
 75

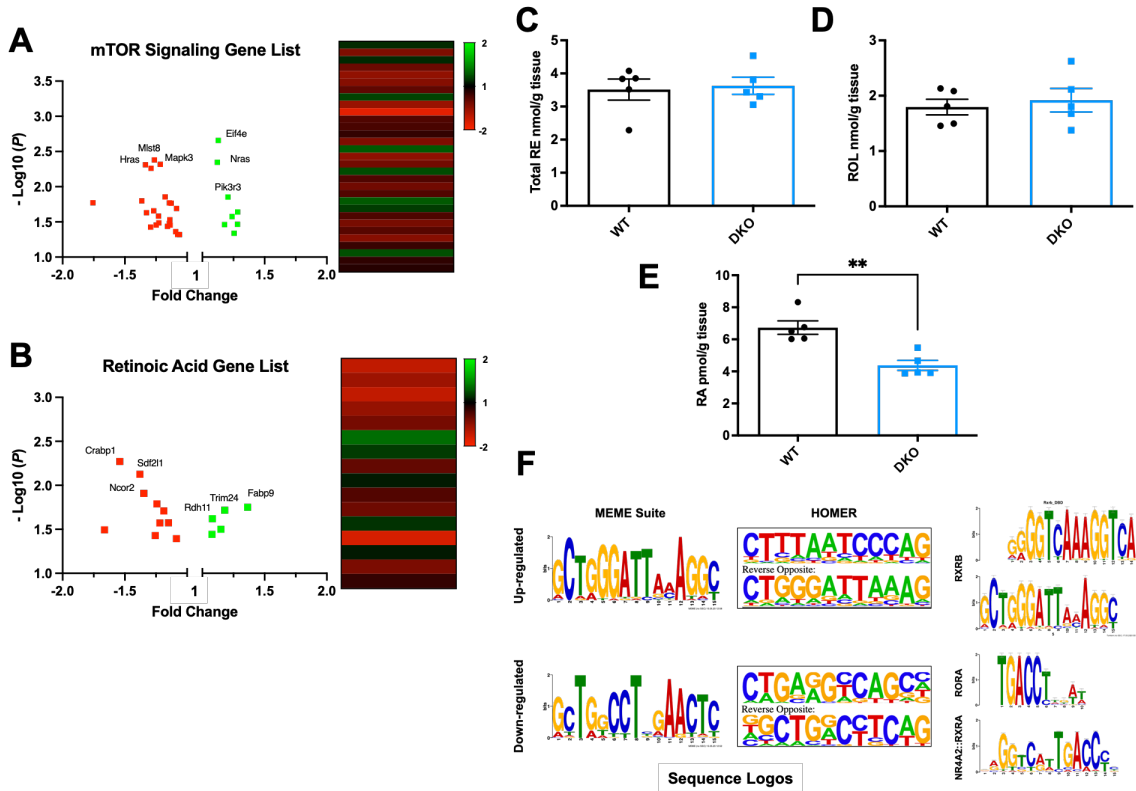

76  
77

78 **Fig. S5. Retinoic acid homeostasis and signaling are altered in DKO testes**  
 79 **{A}** Schematic Output of pathway pipeline analysis investigating all “mTOR signaling” GO  
 80 pathway gene lists. Gene lists were curated for integration with RNA expression data. Real  
 81 expression was validated by thresholding a minimum 10 transcripts per million and statistically  
 82 significant genes ( $P < 0.05$ ) fold change were output in volcano plot and heatmap with 31 total  
 83 genes identified, sorted by ascending  $P$  value. **{B}** Output of pathway pipeline analysis  
 84 investigating all “Retinoic Acid”, “Retinoid Metabolism” and “Retinoic Acid Signaling” GO pathway  
 85 gene lists. Gene lists were curated for integration with RNA expression data. Real expression  
 86 was validated by thresholding a minimum 10 transcripts per million and statistically significant  
 87 genes ( $P < 0.05$ ) fold change were output in volcano plot and heatmap with 15 total genes  
 88 identified, sorted by ascending  $P$  value. **{C}** Quantification of total retinyl esters from WT and  
 89 DKO testes,  $n=5$  animals per genotype. **{D}** Quantification of Vitamin A (retinol) from WT and  
 90 DKO testes,  $n=5$  animals per genotype. **{E}** Quantification of all-*trans* retinoic acid from WT and  
 91 DKO testes,  $n=5$  mice, \*\*  $P$  value = 0.0025. **{F}** Upstream regulatory sequences (5` 1000bp)  
 92 from all significantly up-regulated and down-regulated genes were processed to identify enriched  
 93 un-gapped sequences conserved across transcripts with either MEME Suite (left) or HOMER  
 94 (center). The top five statistically significant DNA sequences of each were then analyzed and  
 95 aligned for querying against known binding motifs. We identified significant enrichment of retinoic  
 96 acid related binding motifs including putative RXRs, and RORA binding sequences (right).  
 97

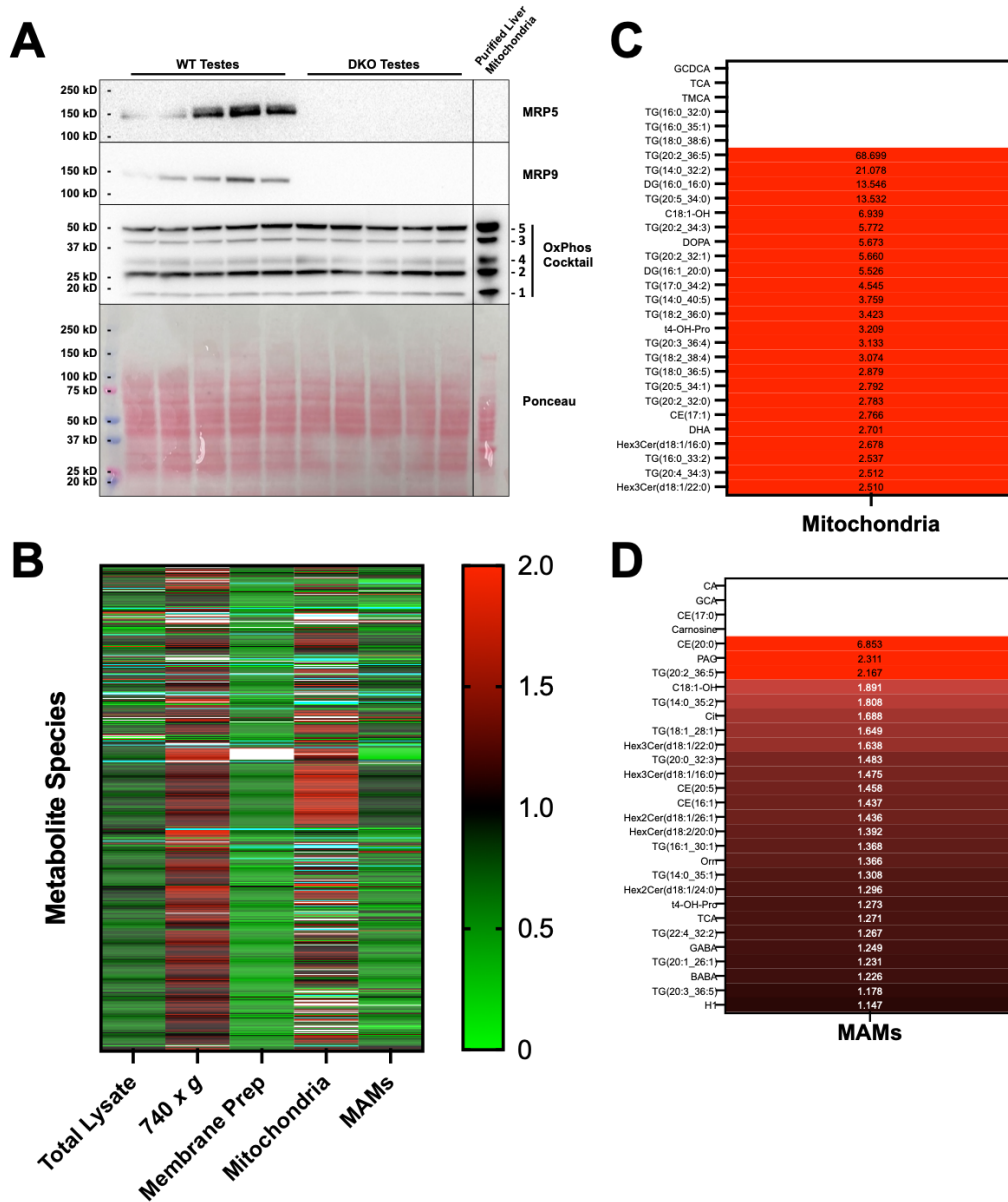

98  
99

100 **Fig. S6. Target high-throughput metabolomics of testes reveals triglyceride accumulation**  
101 **in subcellular fractions**

102 **{A}** Immunoblotting of testes total lysates probing with anti-Total OxPhos Complex Kit, MRP5 and  
103 MRP9 antibodies. Complex Kit cocktail targets are premixed mouse monoclonal antibodies (#1 –  
104 Complex I, C-I-20 ND6; #2 – Complex II, C-II-30 FeS; #3 – Complex III, C-III-Core 2; #4 –  
105 Complex IV, C-IV-1; #5 – Complex V, C-V-a) and targets are labeled 1-5 on right hand side of the  
106 immunoblot. **{B}** Targeted high-throughput metabolomics of subcellular fractions from WT and  
107 DKO testes, utilizing Biocrates MxP® Quant 500 kit with quantification of 630 individual species,  
108 output represented as fold change normalized to total protein. **{C}** Top 30 accumulated  
109 metabolites and lipid species in the mitochondria of DKO testes quantified from subpanel B, fold  
110 change is annotated for each species while empty white bars represent infinity. **{D}** Top 30

111 accumulated metabolites and lipid species in the MAMs of DKO testes quantified from subpanel  
112 B, fold change is annotated for each species while empty white bars represent infinity.  
113  
114



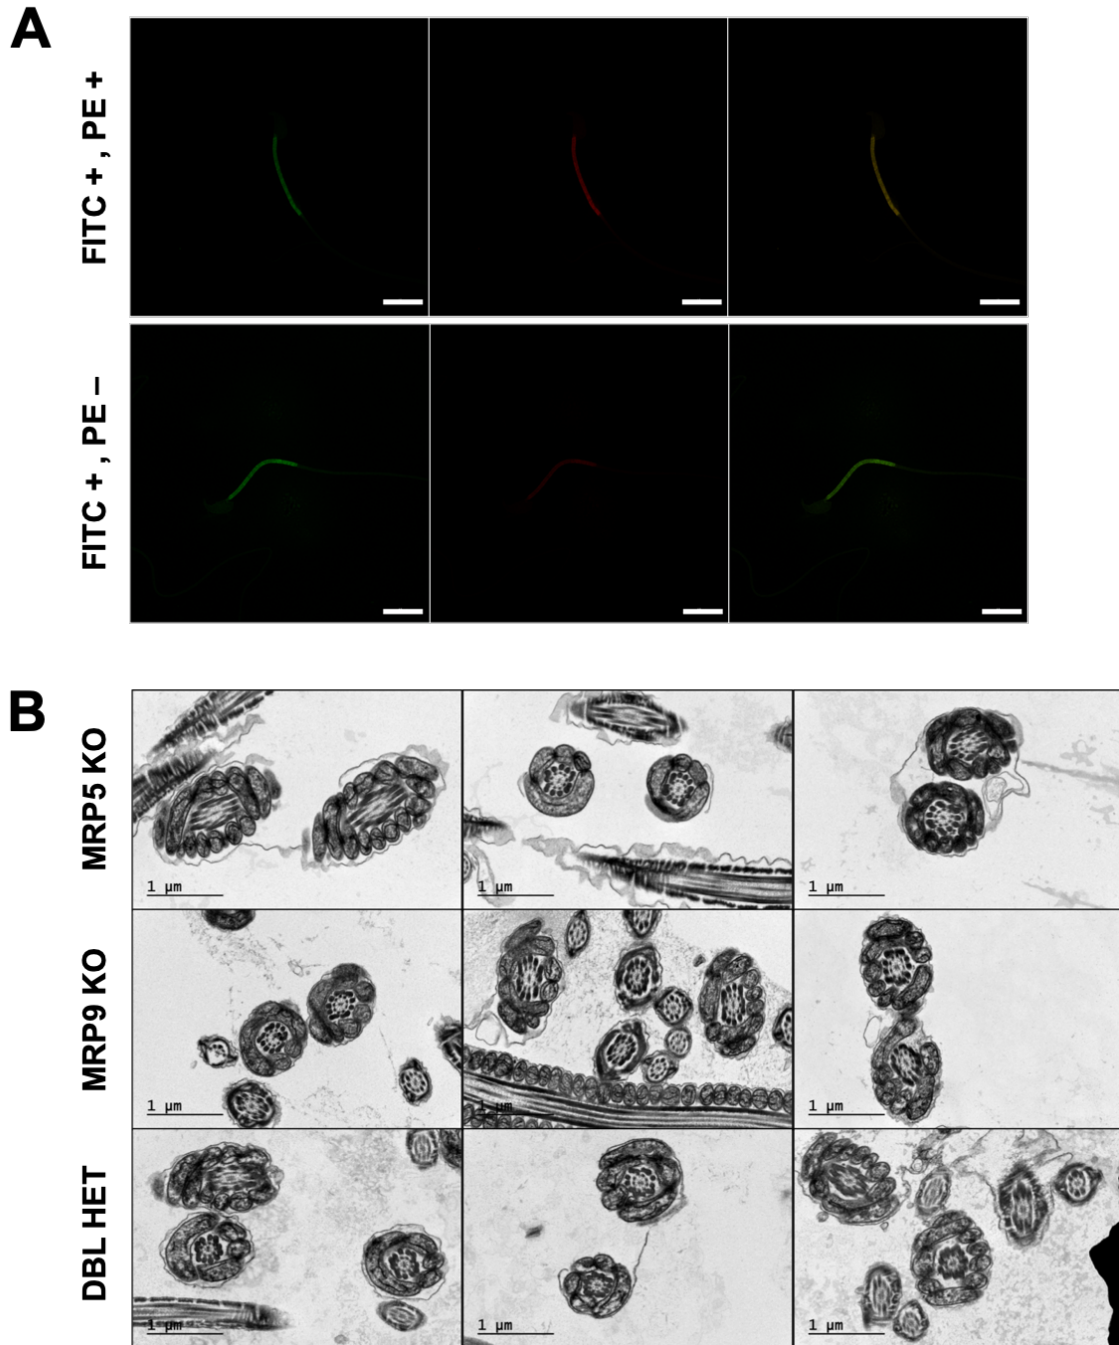

115

116

117 **Fig. S7. Additional sperm characterization via JC-1 staining and TEM imaging**

118 **{A}** Representative JC-1 staining of spermatozoa from **Figure 6A**, Q2 FITC + , PE + (top) and Q3

119 FITC + , PE - (bottom), scalebar equals 10 μm. **{B}** TEM of swum-out caudal epididymal

120 spermatozoa from MRP5 KO (top), MRP9 KO (middle), and Double Het (bottom). Cross sections

121 of the sperm midpiece visualize cristae and mitochondrial morphology of the mitochondrial

122 sheath. Representative images from at least 15 FOVs per sample, scalebar equals 1 μm.

123

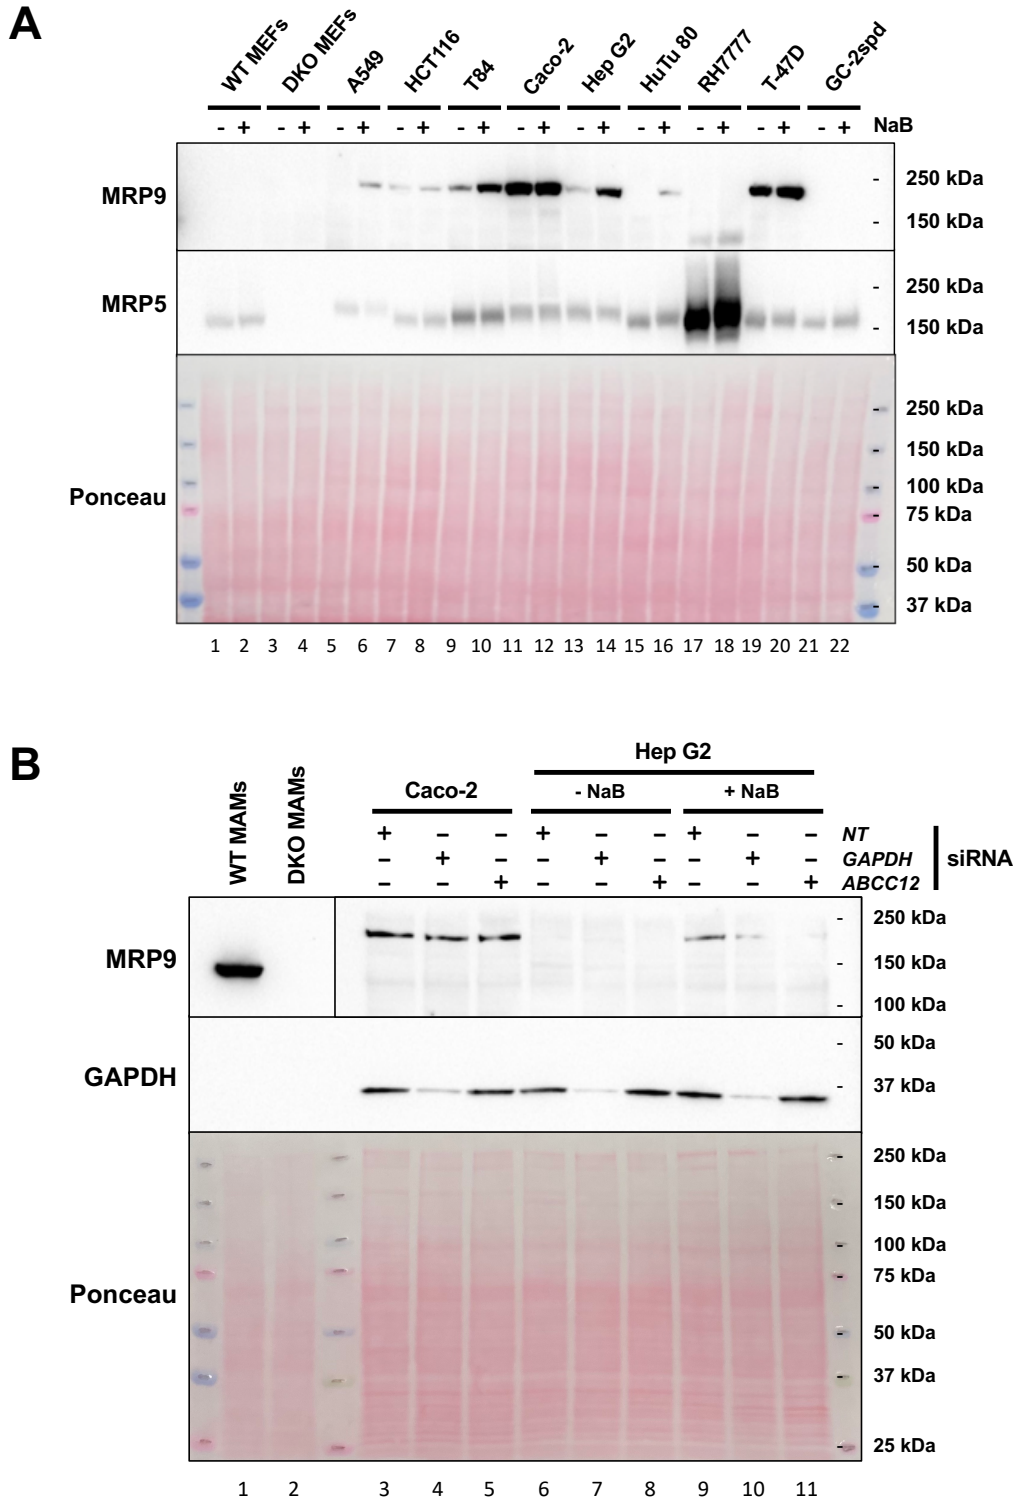

124  
125  
126  
127  
128  
129  
130

**Fig. S8. Endogenous expression of MRP9 cannot be detected or induced in cell culture**  
**{A}** Immunoblot of cell lines treated with either 2mM Sodium Butyrate (NaB) or PBS control for 24 hours; membrane was probed for MRP9 and MRP5. **{B}** Immunoblot analysis of selected cell lines with or without 4mM NaB and treated with Non-Targeted (NT), GAPDH or ABCC12 siRNA for 48hours; membrane was probed for MRP9 and GAPDH protein levels.

**Table S1. Identifiable metabolites from MetaboAnalyst mummichog processing**

| Extraction Method | Compound KEGG ID | Matched form  | Name / ID                                              | pValue | Fold Change |
|-------------------|------------------|---------------|--------------------------------------------------------|--------|-------------|
| Aqueous Pos       | G00526           | M+NaCl[1+]    | Glycan - (GlcA)2 (GlcNAc)2                             | 0.0006 | 3.3345      |
| Amide Pos         | C11039           | M+CH3COO[-]   | 2'-Deoxy-5-hydroxymethylcytidine-5'-triphosphate       | 0.0009 | -2.1258     |
| Amide Pos         | C15976           | M+Cl[-]       | 2-Methyl-1-hydroxypropyl-TPP                           | 0.0017 | 2.7099      |
| Amide Pos         | C11039           | M-H2O-H[-]    | 2'-Deoxy-5-hydroxymethylcytidine-5'-triphosphate       | 0.0022 | -2.0490     |
| Amide Pos         | C00127           | M+Br[-]       | Oxidized glutathione                                   | 0.0034 | -2.4940     |
| Amide Pos         | G00044           | M+CH3COO[-]   | IV2-a-Fuc-Lc4Cer; Type IH glycolipid                   | 0.0057 | -2.8923     |
| Amide Pos         | G00055           | M+CH3COO[-]   | IV2-a-Fuc-nLc4Cer; Type IIH glycolipid                 | 0.0057 | -2.8923     |
| Amide Pos         | G00060           | M+CH3COO[-]   | III3-a-Fuc-nLc4Cer; Lacto-N-fucopentaosyl III ceramide | 0.0057 | -2.8923     |
| Amide Pos         | G10770           | M-2H[2-]      | (GlcNAc)3 (LFuc)1 (Man)3 (Asn)1                        | 0.0060 | -2.3658     |
| Amide Pos         | C05261           | M(S34)-H[-]   | 3-Oxotetradecanoyl-CoA                                 | 0.0061 | -2.9834     |
| Amide Pos         | C05261           | M(C137)-H[-]  | 3-Oxotetradecanoyl-CoA                                 | 0.0061 | -2.9834     |
| Amide Pos         | C04646           | M-H+O[-]      | Thioinosinic acid                                      | 0.0064 | -2.1401     |
| Amide Pos         | C16618           | M-H[-]        | 6-Thioxanthine 5'-monophosphate                        | 0.0064 | -2.1401     |
| Amide Pos         | C00387           | M+Br[-]       | Guanosine                                              | 0.0064 | -2.0488     |
| Aqueous Pos       | C05504           | M+NaCl[1+]    | Estriol-16-Glucuronide                                 | 0.0070 | -2.6085     |
| Aqueous Pos       | C11376           | M-HCOOH+H[1+] | SN38 glucuronide                                       | 0.0070 | -2.6085     |
| Aqueous Pos       | C16327           | M(C13)+2H[2+] | OPC8-CoA                                               | 0.0070 | -2.6085     |
| Amide Pos         | C00655           | M+Br[-]       | Xanthylic acid                                         | 0.0078 | 8.4958      |
| Amide Pos         | C21750           | M+Cl37[-]     | 5-Fluorodeoxyuridine diphosphate                       | 0.0078 | 8.4958      |
| Amide Pos         | C14855           | M+Br81[-]     | 4,5-Dihydro-4-hydroxy-5-S-glutathionyl-benzo[a]pyrene  | 0.0080 | 7.1469      |
| Amide Pos         | C14856           | M+Br81[-]     | 7,8-Dihydro-7-hydroxy-8-S-glutathionyl-benzo[a]pyrene  | 0.0080 | 7.1469      |
| Aqueous Pos       | G01945           | M[1+]         | (Gal)2 (GlcNAc)2 (S)3                                  | 0.0082 | 3.8200      |
| Amide Pos         | G00159           | M-H2O-H[-]    | (Gal)2 (GalNAc)1 (GlcA)2 (Xyl)1 (Ser)1                 | 0.0085 | -3.2323     |
| Amide Pos         | G00163           | M-H2O-H[-]    | (Gal)2 (GlcA)2 (GlcNAc)1 (Xyl)1 (Ser)1                 | 0.0085 | -3.2323     |
| Amide Pos         | C11174           | M-H2O-H[-]    | 1-Diphosphoinositol pentakisphosphate                  | 0.0086 | -2.5534     |
| Amide Pos         | C11526           | M-H2O-H[-]    | 5-Diphosphoinositol pentakisphosphate                  | 0.0086 | -2.5534     |
| Amide Pos         | C00091           | M(C13)-H[-]   | Succinyl-CoA                                           | 0.0089 | 16.1675     |
| Amide Pos         | C00683           | M(C13)-H[-]   | Methylmalonyl-CoA                                      | 0.0089 | 16.1675     |
| Amide Pos         | C01213           | M(C13)-H[-]   | L-methylmalonyl-CoA                                    | 0.0089 | 16.1675     |
| Amide Pos         | C03691           | M+Cl37[-]     | CMP-N-glycoloylneuramate                               | 0.0096 | -3.3747     |
| Amide Pos         | C00877           | M-H[-]        | Crotonoyl-CoA                                          | 0.0113 | -2.3923     |
| Amide Pos         | C01144           | M-H2O-H[-]    | (S)-3-Hydroxybutyryl-CoA                               | 0.0113 | -2.3923     |
| Amide Pos         | C03460           | M-H[-]        | Methacrylyl-CoA                                        | 0.0113 | -2.3923     |
| Amide Pos         | C06000           | M-H2O-H[-]    | (S)-3-Hydroxyisobutyryl-CoA                            | 0.0113 | -2.3923     |
| Amide Pos         | G00005           | M(S34)-H[-]   | (GlcNAc)2 (Man)3 (PP-Dol)1                             | 0.0116 | 3.6595      |
| Amide Pos         | G00005           | M(C137)-H[-]  | (GlcNAc)2 (Man)3 (PP-Dol)1                             | 0.0116 | 3.6595      |
| Amide Pos         | G00066           | M(S34)-H[-]   | (Gal)2 (Glc)1 (GlcNAc)2 (Cer)1                         | 0.0116 | 3.6595      |
| Amide Pos         | G00066           | M(C137)-H[-]  | (Gal)2 (Glc)1 (GlcNAc)2 (Cer)1                         | 0.0116 | 3.6595      |
| Amide Pos         | G00095           | M(S34)-H[-]   | IV3GalNAca-Gb4Cer                                      | 0.0116 | 3.6595      |
| Amide Pos         | G00095           | M(C137)-H[-]  | IV3GalNAca-Gb4Cer                                      | 0.0116 | 3.6595      |
| Amide Pos         | G00889           | M(S34)-H[-]   | (Gal)2 (GalNAc)1 (Glc)1 (GlcNAc)1 (Cer)1               | 0.0116 | 3.6595      |
| Amide Pos         | G00889           | M(C137)-H[-]  | (Gal)2 (GalNAc)1 (Glc)1 (GlcNAc)1 (Cer)1               | 0.0116 | 3.6595      |
| Amide Pos         | G02977           | M(S34)-H[-]   | (Gal)2 (GalNAc)2 (Glc)1 (Cer)1                         | 0.0116 | 3.6595      |
| Amide Pos         | G02977           | M(C137)-H[-]  | (Gal)2 (GalNAc)2 (Glc)1 (Cer)1                         | 0.0116 | 3.6595      |
| Amide Pos         | C05264           | M+CH3COO[-]   | (S)-Hydroxydecanoyl-CoA                                | 0.0117 | 3.1082      |
| Amide Pos         | C00327           | M+K-2H[-]     | Citrulline                                             | 0.0118 | 3.1441      |
| Amide Pos         | C05266           | M-H+O[-]      | (S)-Hydroxyoctanoyl-CoA                                | 0.0127 | -3.7376     |
| Aqueous Neg       | G00149           | M+Br81[-]     | (GlcN)1 (Ino(acyl)-P)1 (Man)3 (EtN)1 (P)1              | 0.0144 | 3.1562      |
| Amide Pos         | C01832           | M+HCOO[-]     | Lauroyl-CoA                                            | 0.0172 | 3.5276      |
| Aqueous Pos       | C18043           | M(S34)+H[1+]  | Cholesterol sulfate                                    | 0.0177 | -3.0325     |
| Aqueous Pos       | C18043           | M(C137)+H[1+] | Cholesterol sulfate                                    | 0.0177 | -3.0325     |
| Amide Pos         | C00183           | M+Na-2H[-]    | L-Valine                                               | 0.0224 | -2.1317     |
| Amide Pos         | C00719           | M+Na-2H[-]    | Betaine                                                | 0.0224 | -2.1317     |
| Amide Pos         | G00026           | M+Cl[-]       | (Gal)1 (GalNAc)1 (Neu5Ac)1 (Ser/Thr)1                  | 0.0228 | -8.3344     |
| Aqueous Pos       | G00158           | M+HCOONa[1+]  | (Gal)2 (GalNAc)1 (GlcA)1 (Xyl)1 (Ser)1                 | 0.0235 | -2.4856     |
| Aqueous Pos       | G00162           | M+HCOONa[1+]  | (Gal)2 (GlcA)1 (GlcNAc)1 (Xyl)1 (Ser)1                 | 0.0235 | -2.4856     |
| Aqueous Neg       | G00157           | M+Br[-]       | (Gal)2 (GlcA)1 (Xyl)1 (Ser)1                           | 0.0237 | -2.2724     |
| Organic Pos       | C16338           | M+HCOOK[1+]   | 3-Oxo-OPC4-CoA                                         | 0.0251 | 1.8715      |
| Amide Pos         | C04646           | M-H+O[-]      | Thioinosinic acid                                      | 0.0292 | -2.7960     |
| Amide Pos         | C16618           | M-H[-]        | 6-Thioxanthine 5'-monophosphate                        | 0.0292 | -2.7960     |
| Organic Pos       | G13036           | M[1+]         | (GlcA)2 (GlcN)1 (GlcNAc)1 (S)3                         | 0.0423 | 2.4015      |
| Amide Pos         | C02843           | M(C13)-H[-]   | Long-chain acyl-CoA                                    | 0.0429 | -1.9489     |
| Aqueous Neg       | C05791           | M+Cl[-]       | D-Urobilinogen                                         | 0.0454 | -2.2582     |
| Amide Pos         | C00942           | M(C137)-H[-]  | Cyclic GMP                                             | 0.0455 | 2.0594      |
| Aqueous Pos       | G00063           | M[1+]         | IV3NeuAc,III3Fuc-nLc4Cer                               | 0.0480 | 1.9138      |

Fold change and *P* values for statistically significant species identifiable to KEGG IDs based on mummichog analysis from all six untargeted metabolomics datasets of the testes. Peak intensity tables were uploaded to MetaboAnalyst suite and queried with a 5ppm mass tolerance for ID.

136  
137

**Table S2. All significant pathways identified by integrative MetaboAnalyst analysis of metabolomics and RNAseq**

| MetaboAnalyst Testes Pathways         | Total | Expected | Raw p     | -LOG(p) | FDR      | Impact  |
|---------------------------------------|-------|----------|-----------|---------|----------|---------|
| Phosphatidylinositol signaling system | 74    | 5.1195   | 0.0013121 | 6.6362  | 0.082863 | 0.57534 |
| Drug metabolism - other enzymes       | 69    | 4.7736   | 0.0022033 | 6.1178  | 0.082863 | 0.30882 |
| Pyruvate metabolism                   | 45    | 3.1132   | 0.0029594 | 5.8228  | 0.082863 | 0.70455 |
| Citrate cycle (TCA cycle)             | 42    | 2.9057   | 0.0068637 | 4.9815  | 0.13233  | 1.1463  |
| Glycolysis or Gluconeogenesis         | 61    | 4.2201   | 0.0078766 | 4.8439  | 0.13233  | 0.65    |
| Purine metabolism                     | 169   | 11.692   | 0.039654  | 3.2276  | 0.37186  | 0.65476 |
| Propanoate metabolism                 | 48    | 3.3208   | 0.044216  | 3.1187  | 0.37186  | 0.59574 |
| Inositol phosphate metabolism         | 69    | 4.7736   | 0.045331  | 3.0938  | 0.37186  | 0.27941 |
| Drug metabolism - cytochrome P450     | 39    | 2.6981   | 0.048529  | 3.0256  | 0.37186  | 0.15789 |
| Ether lipid metabolism                | 39    | 2.6981   | 0.048529  | 3.0256  | 0.37186  | 0.31579 |
| Lysine degradation                    | 49    | 3.3899   | 0.048696  | 3.0222  | 0.37186  | 0.3125  |

138  
139  
140  
141  
142

Output of all statistically significant pathways determined by MetaboAnalyst combined analysis of RNAseq gene lists with differential expression changes and metabolomics mummichog putative KEGG IDs.

143 **Table S3. Guide RNA sequences for targeting mouse MRP9 (*ABCC12*)**

|                             |                                   |
|-----------------------------|-----------------------------------|
| GENE NAME: <b>Abcc12</b>    |                                   |
| ACCESSION: <b>NM_172912</b> |                                   |
| MRP9_mouse sgRNA#1:         | <b>5' CCAGCATCATCCACAGGATT 3'</b> |
| MRP9_mouse sgRNA#2:         | <b>5' TTGATGTCCGATGAGTCATA 3'</b> |

144  
145

146 **Table S4. List of primers used for genotyping mice**

| <b>Primer</b> | <b>Sequence</b>       |
|---------------|-----------------------|
| mMRP5 FWD     | CTAGAGTCTAATCCGTATTGG |
| mMRP5 REV     | CCCGCAAATACATTCAAACC  |
| mMRP5-HYG FWD | GCTTTCAGCTTCGATGTAGG  |
| mMRP5-HYG REV | CGTCAGGACATTGTTGGAGC  |
| mMRP9 FWD     | GGTCAGCAGCTCCTGTAG    |
| mMRP9 REV     | CTTCCTCCAGGACCCTGA    |

147  
148

149 **Movie S1 (separate file). Immunofluorescence of cells transfected with MRP9 confirms**  
150 **novel subcellular localization in close proximity to mitochondria**

151 Movie of 3D rendering and orthogonal slices from Airyscan super resolution microscopy of HeLa  
152 cells transfected with human *ABCC12*. Mitochondria were stained with Mitotracker Deep Red FM  
153 immediately prior to fixation and immunofluorescence. Antibody probing for MRP9 and Calnexin  
154 was followed by Alexa-488 and Alexa-568 secondary antibodies respectively followed by DAPI  
155 counter staining prior to mounting.  
156
